# Supplementary material for: Polygonatum cyrtonema Hua Polysaccharides with Antiaging and Stress Resistance Efficacies in Caenorhabditis elegans
Source: Hindawi journal article supplement (doi:10.1155/2023/8829542), 2023-08-08
Supplement: f1 [file 8829542.f1.docx]

***Polygonatum cyrtonema* Hua Polysaccharides with Anti-aging and Stress Resistance Efficacies in *Caenorhabditis elegans***

Wei Wang 1,#, Ying Yang 1,#, Ting-ting Hou 1, Shan-yong Yi 1, Yan-jun Chen 1, Guo-si Li 1, Cun-wu Chen 1, Bang-xing Han 1, Jia-ping Ke 2,*, Dong Liu 1,* and Lei-lei Gao 1,*

1 Anhui Engineering Research Center for Eco-agriculture of Traditional Chinese Medicine, West Anhui University, Lu'an 237012, China.

2 State Key Laboratory of Tea Plant Biology and Utilization, Anhui Agricultural University, Hefei 230036, China.

**
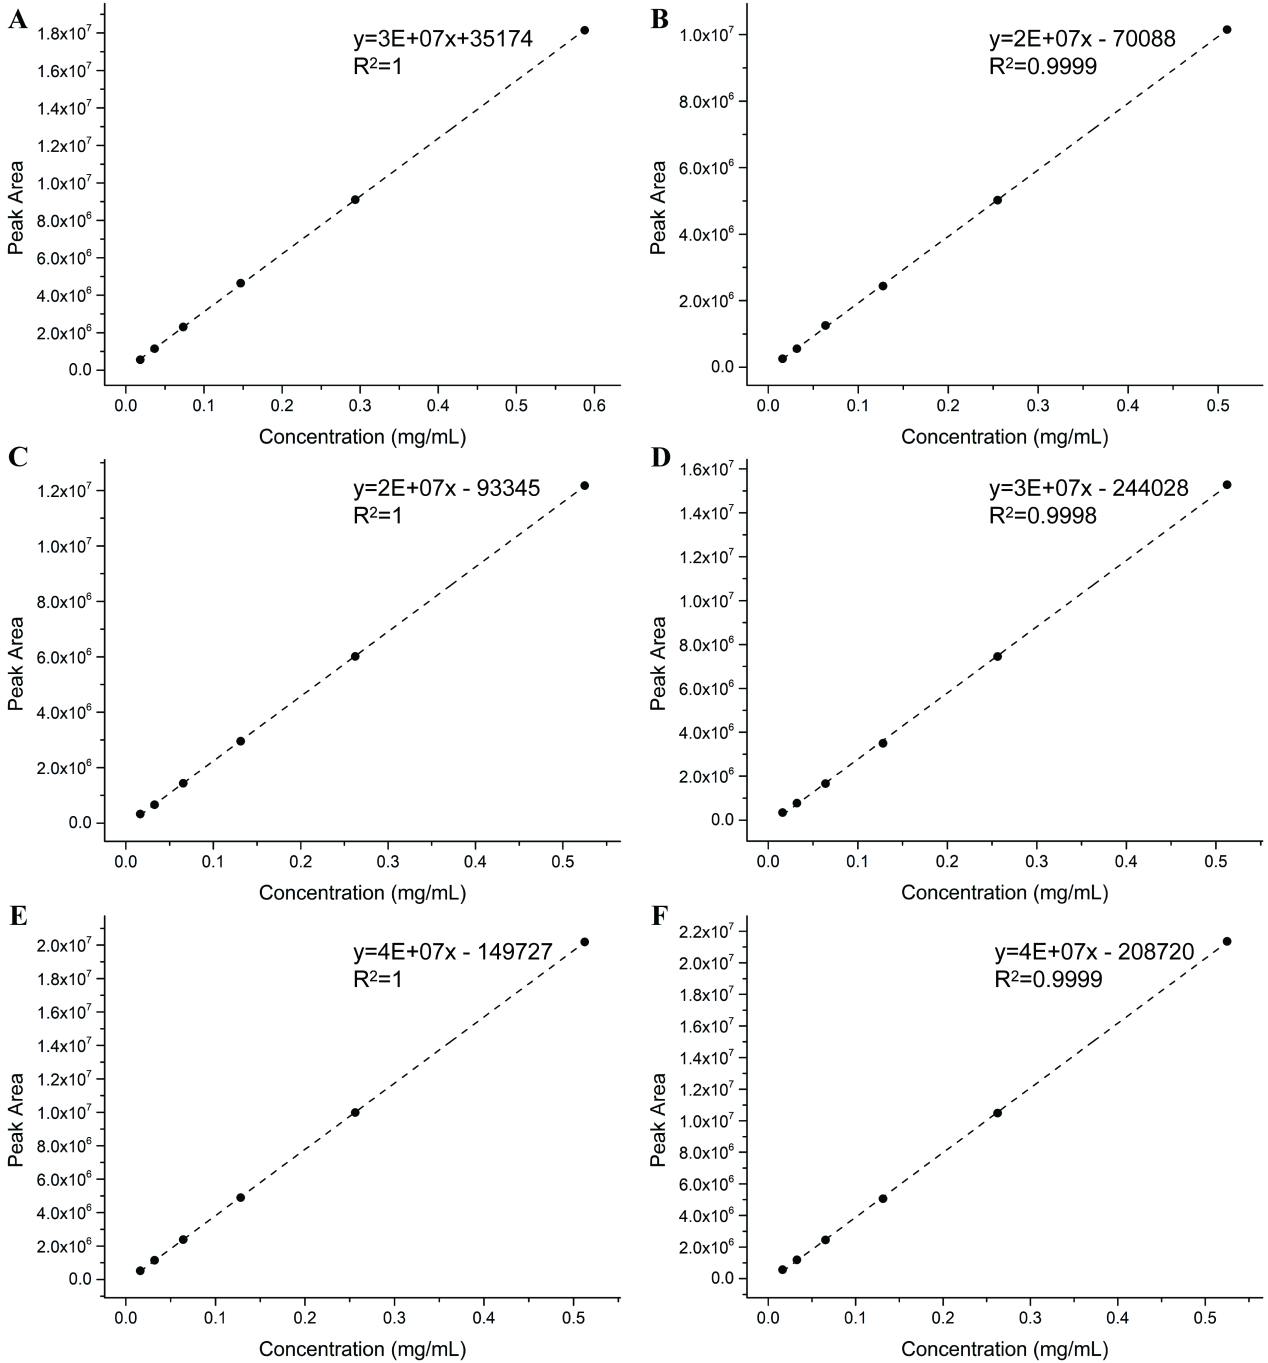
**

**Figure S1.** The standard curves for detection of monosaccharide-derivatives

(A: Man-derivative, B: GalA-derivative, C: Glu-derivative, D: Gal-derivative, E: Xyl-derivative, F: Ara-derivative)
